# Supplementary material for: Exploration of the treatment of fish-canning industry effluents by aqueous-phase reforming using Pt/C catalysts
Source: Royal Society of Chemistry journal article supplement (doi:10.1039/c8ew00414e), 2018-01-01
Supplement: c8ew00414e1.pdf [file c8ew00414e1.pdf]

# Supplementary Material

Exploration of the aqueous-phase reforming on tuna-cooking effluents  
using Pt/C catalysts

A.S. Oliveira, J.A. Baeza, L. Calvo\*, N. Alonso-Morales, F. Heras, J. Lemus, J.J. Rodriguez,  
M.A. Gilarranz

Sección Departamental de Ingeniería Química, C/Francisco Tomás y Valiente 7, Universidad  
Autónoma de Madrid, 28049 Madrid, Spain

\*corresponding author e-mail: [luisa.calvo@uam.es](mailto:luisa.calvo@uam.es)

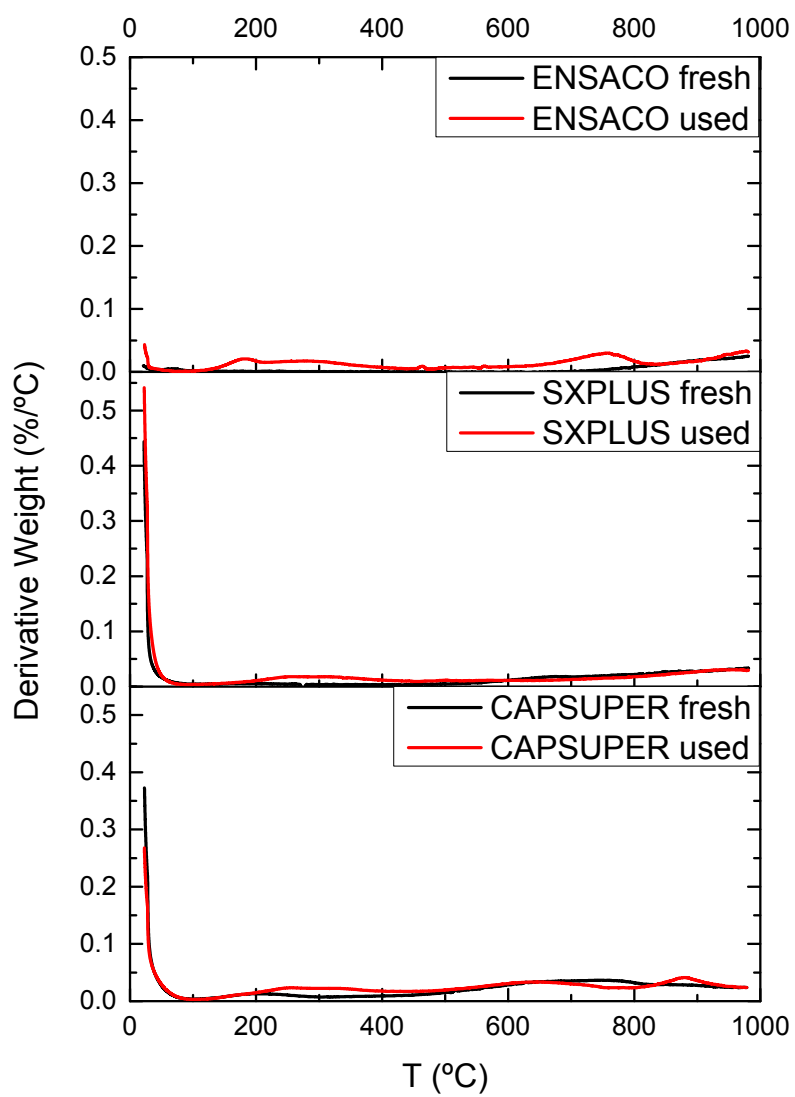

Figure S1. TGA curves of the fresh and used supports

Table S1. Elemental composition of the fresh and used CAPSUPER support

| Support        | % C          | % H         | % N         | % S         |
|----------------|--------------|-------------|-------------|-------------|
| CAPSUPER fresh | 81.71 ± 0.70 | 2.45 ± 0.07 | 0.18 ± 0.01 | 0.03 ± 0.02 |
| CAPSUPER used  | 80.45 ± 0.18 | 2.72 ± 0.06 | 2.19 ± 0.04 | 0.03 ± 0.01 |
